# Supplementary material
Source: publisher site journal article supplement (https://www.spandidos-publications.com/1758/downloadSupplementary)

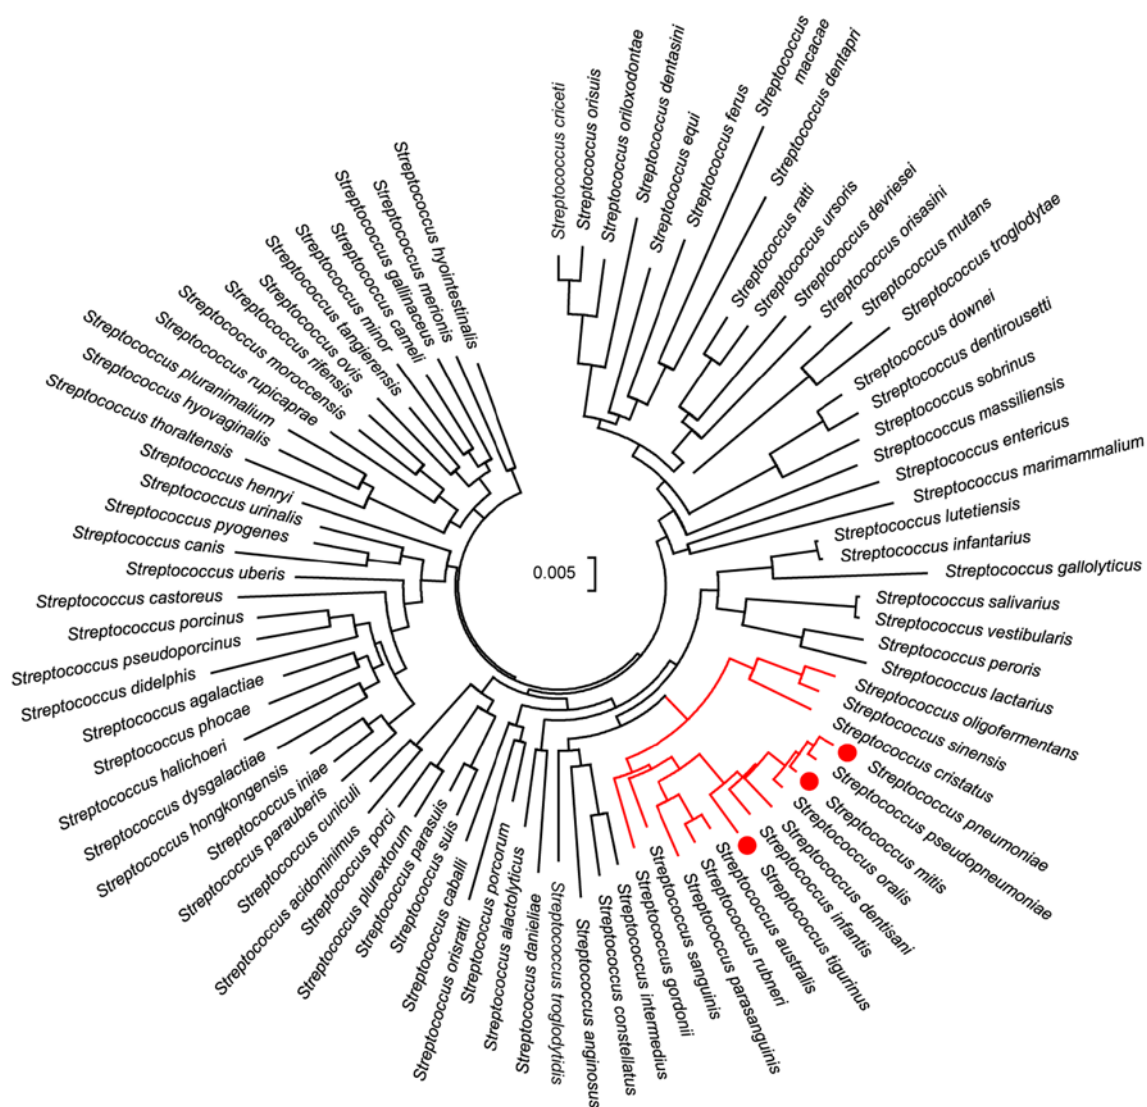

Supplement: Supplementary file 1 [file downloadSupplementary]
